# Supplementary material for: Effect of Immobilization Support and Fermentation Temperature on Beer and Fermented Milk Aroma Profiles
Source: MDPI journal article supplement (doi:10.3390/beverages7030047), 2021-07-05
Supplement: s1 [file s1]

**Table S1.** Volatile compounds (mg L<sup>-1</sup>) of beers (GC-MS analysis) with thermally-dried immobilized *S. cerevisiae* cells on tubular cellulose from coconut shells

| Storage (months)              | 0            | 0            | 0            | 0            | 1            | 3            |
|-------------------------------|--------------|--------------|--------------|--------------|--------------|--------------|
| Fermentation temperature (°C) | 25           | 15           | 10           | 5            | 15           | 15           |
| <b>Esters</b>                 |              |              |              |              |              |              |
|                               | 25.40 ±      |              |              |              |              |              |
| Ethyl acetate                 | 1.13         | 19.30 ± 0.99 | 17.15 ± 0.78 | 13.20 ± 1.13 | 15.05 ± 0.49 | 16.15 ± 0.35 |
| Ethyl butanoate               | 4.00 ± 0.42  | 2.50 ± 0.21  | 2.00 ± 0.07  | 1.20 ± 0.14  | 2.30 ± 0.21  | 1.50 ± 0.07  |
| Isoamyl acetate               | 5.00 ± 0.71  | 2.98 ± 0.11  | 3.50 ± 0.14  | 1.81 ± 0.08  | 2.03 ± 0.18  | 2.40 ± 0.11  |
| Ethyl hexanoate               | 4.15 ± 0.21  | 4.50 ± 0.14  | 2.00 ± 0.14  | 1.80 ± 0.14  | 2.31 ± 0.02  | 2.01 ± 0.16  |
| Ethyl octanoate               | 1.90 ± 0.16  | 1.00 ± 0.08  | 1.50 ± 0.07  | 0.80 ± 0.17  | 0.69 ± 0.11  | 1.08 ± 0.11  |
| Ethyl decanoate               | 4.40 ± 0.71  | 2.91 ± 0.13  | 2.00 ± 0.28  | 1.55 ± 0.11  | 0.72 ± 0.04  | 0.94 ± 0.11  |
| Ethyl dec-9-enoate            | 0.90 ± 0.14  | 1.18 ± 0.09  | 0.50 ± 0.07  | 0.40 ± 0.11  | 0.72 ± 0.06  | 0.79 ± 0.11  |
| Phenylethyl acetate           | nd           | nd           | 0.32 ± 0.04  | 0.21 ± 0.01  | 0.39 ± 0.05  | 0.20 ± 0.04  |
| Ethyl dodecanoate             | nd           | 0.18 ± 0.01  | 0.13 ± 0.02  | nd           | 0.20 ± 0.02  | 0.17 ± 0.02  |
| Ethyl tetradecanoate          | 0.15 ± 0.01  | 0.20 ± 0.03  | 0.20 ± 0.01  | 0.06 ± 0.06  | 0.05 ± 0.04  | 0.15 ± 0.04  |
| Ethyl hexadecanoate           | 0.19 ± 0.03  | 0.21 ± 0.04  | 0.16 ± 0.05  | 0.10 ± 0.03  | 0.25 ± 0.06  | 0.20 ± 0.01  |
| <b>Acids</b>                  |              |              |              |              |              |              |
| Acetic acid                   | 2.10 ± 0.28  | 2.50 ± 0.28  | 3.00 ± 0.57  | 3.98 ± 0.59  | 2.00 ± 0.28  | 2.25 ± 0.35  |
| Butanoic acid                 | 1.51 ± 0.27  | 1.35 ± 0.21  | 0.50 ± 0.03  | 0.80 ± 0.25  | 1.50 ± 0.25  | 0.97 ± 0.21  |
| Hexanoic acid                 | 0.30 ± 0.01  | 0.20 ± 0.04  | nd           | 0.10 ± 0.03  | 0.11 ± 0.02  | 0.12 ± 0.03  |
| Octanoic acid                 | 1.23 ± 0.18  | 0.88 ± 0.04  | 0.51 ± 0.02  | 0.21 ± 0.04  | 0.82 ± 0.04  | 0.63 ± 0.09  |
| Nonanoic acid                 | 0.10 ± 0.03  | nd           | 0.16 ± 0.01  | 0.20 ± 0.04  | 0.24 ± 0.04  | 0.30 ± 0.03  |
| Decanoic acid                 | 0.30 ± 0.04  | 0.30 ± 0.06  | 0.21 ± 0.01  | 0.15 ± 0.01  | 0.21 ± 0.03  | 0.16 ± 0.08  |
| <b>Alcohols*</b>              |              |              |              |              |              |              |
| n-propanol                    | 9.80 ± 0.28  | 10.85 ± 1.06 | 10.20 ± 0.99 | 4.30 ± 0.85  | 7.31 ± 0.86  | 6.52 ± 0.36  |
| 2-methyl-propanol             | 49.65 ± 6.15 | 46.35 ± 2.33 | 40.85 ± 1.91 | 35.60 ± 1.98 | 40.25 ± 1.63 | 40.55 ± 1.91 |
| 2- and 3-methyl butanol       | 71.15 ± 8.70 | 55.30 ± 7.21 | 50.10 ± 1.41 | 40.95 ± 7.14 | 59.30 ± 5.09 | 45.40 ± 2.12 |
| 2-phenylethanol               | 20.20 ± 1.41 | 10.35 ± 1.34 | 15.65 ± 1.63 | 7.45 ± 1.06  | 10.55 ± 1.48 | 12.10 ± 2.12 |

\*Ethanol was detected in all cases; nd: not detected

**Table S2.** Volatile compounds (mg L<sup>-1</sup>) of beers (GC-MS analysis) with thermally-dried immobilized *S. cerevisiae* cells on tubular cellulose from peanut shells

| Storage (months)              | 0            | 0            | 0            | 0            | 1            | 3            |
|-------------------------------|--------------|--------------|--------------|--------------|--------------|--------------|
| Fermentation temperature (°C) | 25           | 15           | 10           | 5            | 15           | 15           |
| <b>Esters</b>                 |              |              |              |              |              |              |
| Ethyl acetate                 | 21.00 ± 1.41 | 17.30 ± 0.71 | 14.20 ± 0.57 | 10.10 ± 1.41 | 17.10 ± 1.70 | 15.20 ± 1.70 |
| Ethyl butanoate               | 3.00 ± 0.42  | 2.00 ± 0.14  | 2.10 ± 0.07  | 1.50 ± 0.14  | 1.80 ± 0.21  | 2.30 ± 0.14  |
| Isoamyl acetate               | 4.50 ± 0.71  | 2.90 ± 0.21  | 2.50 ± 0.14  | 1.70 ± 0.07  | 3.15 ± 0.28  | 1.50 ± 0.25  |
| Ethyl hexanoate               | 4.00 ± 0.42  | 2.70 ± 0.14  | 2.30 ± 0.07  | 1.80 ± 0.14  | 2.36 ± 0.08  | 2.06 ± 0.24  |
| Ethyl octanoate               | 1.00 ± 0.28  | 0.70 ± 0.07  | 0.50 ± 0.07  | 0.40 ± 0.08  | 0.49 ± 0.09  | 0.79 ± 0.05  |
| Ethyl decanoate               | 3.00 ± 0.14  | 2.30 ± 0.14  | 2.00 ± 0.28  | 1.70 ± 0.10  | 2.51 ± 0.23  | 1.72 ± 0.14  |
| Ethyl dec-9-enoate            | 0.90 ± 0.14  | 0.70 ± 0.07  | 0.40 ± 0.07  | 0.50 ± 0.03  | nd           | 0.34 ± 0.16  |
| Phenylethyl acetate           | 0.40 ± 0.07  | 0.10 ± 0.03  | nd           | nd           | nd           | 0.19 ± 0.04  |
| Ethyl hexadecanoate           | 0.21 ± 0.01  | 0.17 ± 0.01  | 0.11 ± 0.01  | 0.15 ± 0.04  | 0.22 ± 0.02  | nd           |
| <b>Acids</b>                  |              |              |              |              |              |              |
| Acetic acid                   | 3.00 ± 0.28  | 3.50 ± 0.28  | 3.90 ± 0.42  | 5.20 ± 0.35  | 3.00 ± 0.28  | 2.04 ± 0.26  |
| Butanoic acid                 | 1.00 ± 0.07  | 0.70 ± 0.07  | 0.80 ± 0.08  | 0.40 ± 0.04  | nd           | 0.79 ± 0.05  |
| Hexanoic acid                 | 0.20 ± 0.01  | 0.15 ± 0.03  | nd           | 0.10 ± 0.03  | 0.11 ± 0.01  | 0.21 ± 0.03  |
| Octanoic acid                 | 0.61 ± 0.06  | 0.55 ± 0.07  | 0.40 ± 0.03  | 0.31 ± 0.05  | 0.66 ± 0.05  | 0.53 ± 0.05  |
| Nonanoic acid                 | 0.20 ± 0.03  | 0.15 ± 0.01  | nd           | nd           | 0.10 ± 0.01  | nd           |
| Decanoic acid                 | 0.20 ± 0.04  | 0.23 ± 0.04  | 0.18 ± 0.03  | 0.15 ± 0.01  | 0.20 ± 0.02  | 0.09 ± 0.05  |
| <b>Alcohols*</b>              |              |              |              |              |              |              |
| n-propanol                    | 9.30 ± 0.42  | 8.00 ± 0.42  | 7.10 ± 0.28  | 5.60 ± 0.14  | 7.99 ± 0.11  | 7.54 ± 0.39  |
| 2-methyl-propanol             | 50.00 ± 4.24 | 45.00 ± 0.99 | 40.15 ± 1.77 | 35.80 ± 0.99 | 40.65 ± 1.06 | 41.05 ± 1.20 |
| 2- and 3-methyl butanol       | 65.10 ± 7.07 | 57.20 ± 9.90 | 55.10 ± 5.66 | 49.10 ± 2.69 | 59.85 ± 4.31 | 50.10 ± 4.94 |
| 2-phenylethanol               | 18.20 ± 2.83 | 12.30 ± 1.41 | 11.00 ± 1.56 | 9.00 ± 0.92  | 13.17 ± 0.68 | 9.45 ± 0.64  |

\*Ethanol was detected in all cases; nd: not detected

**Table S3.** Volatile compounds ( $\mu\text{g kg}^{-1}$ ) of fermented milks (GC-MS analysis) with thermally-dried immobilized *L. casei* cells on tubular cellulose from coconut shells

| Storage (months)                                | 0                | 0                | 0                | 1                | 3                |
|-------------------------------------------------|------------------|------------------|------------------|------------------|------------------|
| Fermentation temperature ( $^{\circ}\text{C}$ ) | 37               | 18               | 10               | 18               | 18               |
| <b>Esters</b>                                   |                  |                  |                  |                  |                  |
| Ethyl acetate                                   | $0.30 \pm 0.14$  | nd               | nd               | nd               | nd               |
| Ethyl butanoate                                 | $0.60 \pm 0.28$  | $0.30 \pm 0.14$  | $0.40 \pm 0.28$  | nd               | nd               |
| <b>Acids</b>                                    |                  |                  |                  |                  |                  |
| Acetic acid                                     | $25.05 \pm 2.62$ | $31.00 \pm 3.25$ | $18.00 \pm 1.41$ | $29.00 \pm 2.12$ | $27.00 \pm 2.97$ |
| Butanoic acid                                   | $39.00 \pm 4.95$ | $50.00 \pm 3.54$ | $25.00 \pm 1.70$ | $20.30 \pm 3.25$ | $24.30 \pm 3.25$ |
| Hexanoic acid                                   | $47.20 \pm 3.11$ | $83.30 \pm 3.39$ | $79.30 \pm 4.24$ | $59.30 \pm 2.69$ | $66.20 \pm 4.38$ |
| Octanoic acid                                   | $19.50 \pm 2.12$ | $37.20 \pm 4.53$ | $23.20 \pm 3.11$ | $42.10 \pm 5.66$ | $40.30 \pm 4.81$ |
| Nonanoic acid                                   | $9.10 \pm 1.84$  | nd               | nd               | nd               | nd               |
| Decanoic acid                                   | $51.30 \pm 3.54$ | $60.20 \pm 2.69$ | $55.40 \pm 4.81$ | $63.20 \pm 4.81$ | $57.20 \pm 5.80$ |
| Dodecanoic acid                                 | nd               | $7.60 \pm 1.70$  | nd               | nd               | $3.20 \pm 0.71$  |
| <b>Alcohols*</b>                                |                  |                  |                  |                  |                  |
| 1-hexanol                                       | $6.20 \pm 0.99$  | nd               | nd               | $1.40 \pm 0.57$  | nd               |
| 3-methyl-1-butanol                              | $1.40 \pm 0.57$  | $0.80 \pm 0.28$  | $0.60 \pm 0.14$  | nd               | $0.90 \pm 0.28$  |
| 2-heptanol                                      | nd               | $1.00 \pm 0.42$  | nd               | nd               | nd               |
| 2-nonanol                                       | $2.80 \pm 0.57$  | $6.90 \pm 0.42$  | $2.50 \pm 0.42$  | $4.90 \pm 0.57$  | nd               |
| 2-ethyl-1-hexanol                               | $12.80 \pm 1.41$ | $24.70 \pm 3.54$ | $19.30 \pm 3.25$ | $18.40 \pm 1.70$ | $12.30 \pm 1.27$ |
| <b>Aldehydes</b>                                |                  |                  |                  |                  |                  |
| acetaldehyde                                    | $9.30 \pm 1.70$  | $9.40 \pm 1.41$  | $8.20 \pm 1.27$  | $12.10 \pm 1.41$ | $10.30 \pm 1.27$ |
| hexanal                                         | $12.10 \pm 1.6$  | $8.30 \pm 1.70$  | $9.40 \pm 1.27$  | $7.00 \pm 1.41$  | $6.70 \pm 0.57$  |
| heptanal                                        | $2.10 \pm 0.57$  | nd               | nd               | $1.20 \pm 0.42$  | nd               |
| octanal                                         | $15.10 \pm 2.69$ | $14.30 \pm 1.70$ | $12.10 \pm 1.27$ | $9.00 \pm 1.27$  | $9.50 \pm 1.41$  |
| nonanal                                         | $10.20 \pm 1.70$ | $16.10 \pm 1.41$ | $14.00 \pm 2.12$ | $9.30 \pm 1.27$  | $10.00 \pm 2.12$ |
| (E)-2-nonenal                                   | nd               | $1.90 \pm 0.28$  | $0.90 \pm 0.14$  | nd               | nd               |
| <b>Ketones</b>                                  |                  |                  |                  |                  |                  |
| acetone                                         | $10.20 \pm 1.70$ | $12.30 \pm 1.27$ | nd               | $8.20 \pm 0.57$  | nd               |
| 2-butanone                                      | $53.10 \pm 4.10$ | $60.20 \pm 4.38$ | $45.30 \pm 2.12$ | $46.10 \pm 2.97$ | $33.20 \pm 0.57$ |
| 2-pentanone                                     | $43.90 \pm 3.54$ | $41.30 \pm 4.38$ | $23.40 \pm 2.69$ | $30.50 \pm 4.24$ | $27.30 \pm 3.11$ |
| 2-heptanone                                     | $15.90 \pm 2.12$ | $20.30 \pm 2.97$ | $19.30 \pm 1.98$ | $13.40 \pm 2.12$ | $15.10 \pm 2.12$ |
| 2-undecanone                                    | $7.50 \pm 0.57$  | $10.10 \pm 1.41$ | nd               | $3.90 \pm 0.57$  | $4.00 \pm 0.42$  |
| 2-tridecanone                                   | nd               | $6.10 \pm 0.57$  | nd               | $4.30 \pm 0.42$  | nd               |
| 3-hydroxy-2-butanone (acetoin)                  | $43.50 \pm 4.24$ | $54.30 \pm 4.67$ | $50.20 \pm 4.24$ | $55.10 \pm 4.24$ | $35.10 \pm 2.12$ |
| 2,3-butanedione (diacetyl)                      | $20.30 \pm 2.12$ | $31.50 \pm 4.24$ | $15.40 \pm 1.41$ | $28.20 \pm 2.83$ | $10.90 \pm 1.41$ |
| 2,3-pentanedione                                | nd               | $4.50 \pm 0.57$  | nd               | nd               | $2.10 \pm 0.57$  |

\*Ethanol was detected in all cases; nd: not detected

**Table S4.** Volatile compounds ( $\mu\text{g kg}^{-1}$ ) of fermented milks (GC-MS analysis) with thermally-dried immobilized *L. casei* cells on tubular cellulose from peanut shells

| Storage (months)                                | 0                | 0                | 0                 | 1                | 3                |
|-------------------------------------------------|------------------|------------------|-------------------|------------------|------------------|
| Fermentation temperature ( $^{\circ}\text{C}$ ) | 37               | 18               | 10                | 18               | 18               |
| <b>Esters</b>                                   |                  |                  |                   |                  |                  |
| Ethyl acetate                                   | $0.50 \pm 0.14$  | $1.20 \pm 0.71$  | nd                | $0.60 \pm 0.28$  | nd               |
| Ethyl butanoate                                 | $0.80 \pm 0.28$  | $0.40 \pm 0.14$  | $0.20 \pm 0.14$   | nd               | $0.20 \pm 0.14$  |
| <b>Acids</b>                                    |                  |                  |                   |                  |                  |
| Acetic acid                                     | $30.00 \pm 2.83$ | $25.00 \pm 3.96$ | nd                | $32.00 \pm 2.97$ | $16.00 \pm 1.41$ |
|                                                 | $42.00 \pm 3.54$ | $54.00 \pm 2.83$ | $33.00 \pm 10.04$ | $15.00 \pm 0.7$  | $20.00 \pm 1.41$ |
| Butanoic acid                                   |                  |                  |                   |                  |                  |
| Hexanoic acid                                   | $61.00 \pm 4.38$ | $72.00 \pm 3.96$ | $58.00 \pm 2.12$  | $70.00 \pm 4.24$ | $78.00 \pm 4.10$ |
| Octanoic acid                                   | $38.00 \pm 3.39$ | $48.00 \pm 4.24$ | $35.00 \pm 0.71$  | $54.00 \pm 2.83$ | $50.00 \pm 4.95$ |
| Nonanoic acid                                   | $7.80 \pm 0.71$  | nd               | $1.30 \pm 0.28$   | nd               | $2.10 \pm 0.71$  |
| Decanoic acid                                   | $42.00 \pm 3.54$ | $57.00 \pm 4.38$ | $40.00 \pm 1.27$  | $60.00 \pm 2.12$ | $50.00 \pm 3.68$ |
| Dodecanoic acid                                 | nd               | $10.00 \pm 1.70$ | nd                | $7.50 \pm 0.85$  | $7.00 \pm 0.57$  |
| <b>Alcohols*</b>                                |                  |                  |                   |                  |                  |
| 1-hexanol                                       | $5.20 \pm 1.41$  | $3.10 \pm 0.71$  | nd                | nd               | $2.50 \pm 0.57$  |
| 3-methyl-1-butanol                              | nd               | $0.90 \pm 0.14$  | $0.40 \pm 0.28$   | $1.20 \pm 0.71$  | nd               |
| 2-heptanol                                      | nd               | $1.80 \pm 0.28$  | nd                | $0.90 \pm 0.14$  | $0.50 \pm 0.14$  |
| 2-nonanol                                       | $3.00 \pm 0.71$  | $4.10 \pm 1.13$  | $3.00 \pm 0.7$    | $3.50 \pm 0.57$  | nd               |
| 2-ethyl-1-hexanol                               | $10.20 \pm 1.70$ | $17.40 \pm 2.83$ | $10.00 \pm 1.41$  | $16.30 \pm 2.12$ | $8.90 \pm 0.71$  |
| <b>Aldehydes</b>                                |                  |                  |                   |                  |                  |
| acetaldehyde                                    | $10.00 \pm 1.70$ | $12.00 \pm 2.83$ | $9.50 \pm 1.84$   | $9.00 \pm 1.41$  | $10.80 \pm 2.12$ |
| hexanal                                         | $9.30 \pm 1.41$  | $7.80 \pm 1.70$  | $10.30 \pm 3.54$  | nd               | $7.30 \pm 2.12$  |
| heptanal                                        | nd               | $1.30 \pm 0.71$  | nd                | $0.80 \pm 0.57$  | nd               |
| octanal                                         | $13.20 \pm 2.12$ | $11.50 \pm 1.27$ | $14.00 \pm 2.97$  | $10.30 \pm 2.97$ | nd               |
| nonanal                                         | $9.00 \pm 1.41$  | $13.40 \pm 2.12$ | $12.30 \pm 2.40$  | $5.10 \pm 0.57$  | $10.30 \pm 1.27$ |
| (E)-2-nonenal                                   | nd               | $4.30 \pm 0.28$  | nd                | nd               | $3.10 \pm 0.71$  |
| <b>Ketones</b>                                  |                  |                  |                   |                  |                  |
| acetone                                         | $13.20 \pm 2.12$ | $11.50 \pm 1.41$ | $4.50 \pm 0.85$   | $9.00 \pm 1.98$  | nd               |
| 2-butanone                                      | $49.30 \pm 1.84$ | $55.10 \pm 2.83$ | $40.00 \pm 1.41$  | $39.00 \pm 2.12$ | $28.30 \pm 3.54$ |
| 2-pentanone                                     | $60.00 \pm 4.24$ | $45.10 \pm 2.12$ | $30.00 \pm 2.97$  | $50.00 \pm 2.97$ | $55.00 \pm 3.96$ |
| 2-heptanone                                     | $35.30 \pm 3.25$ | $25.30 \pm 2.83$ | $20.00 \pm 2.12$  | $10.00 \pm 1.13$ | $11.00 \pm 1.27$ |
| 2-undecanone                                    | $12.10 \pm 1.27$ | $9.00 \pm 1.41$  | nd                | $1.85 \pm 0.35$  | $4.30 \pm 0.57$  |
| 2-tridecanone                                   | nd               | $8.20 \pm 1.13$  | nd                | $8.00 \pm 1.41$  | nd               |
| 3-hydroxy-2-butanone (acetoin)                  | $75.30 \pm 4.67$ | $91.20 \pm 4.10$ | $60.30 \pm 3.82$  | $90.00 \pm 4.24$ | $59.30 \pm 2.83$ |
| 2,3-butanedione (diacetyl)                      | $31.30 \pm 3.82$ | $42.30 \pm 4.38$ | $25.20 \pm 2.12$  | $35.20 \pm 2.12$ | $17.30 \pm 1.27$ |
| 2,3-pentanedione                                | $10.30 \pm 2.12$ | $7.50 \pm 1.13$  | nd                | nd               | $4.30 \pm 0.71$  |

\*Ethanol was detected in all cases; nd: not detected
